# Supplementary material
Source: PubMed Central journal article supplement (PMC2903336)

Figure S1

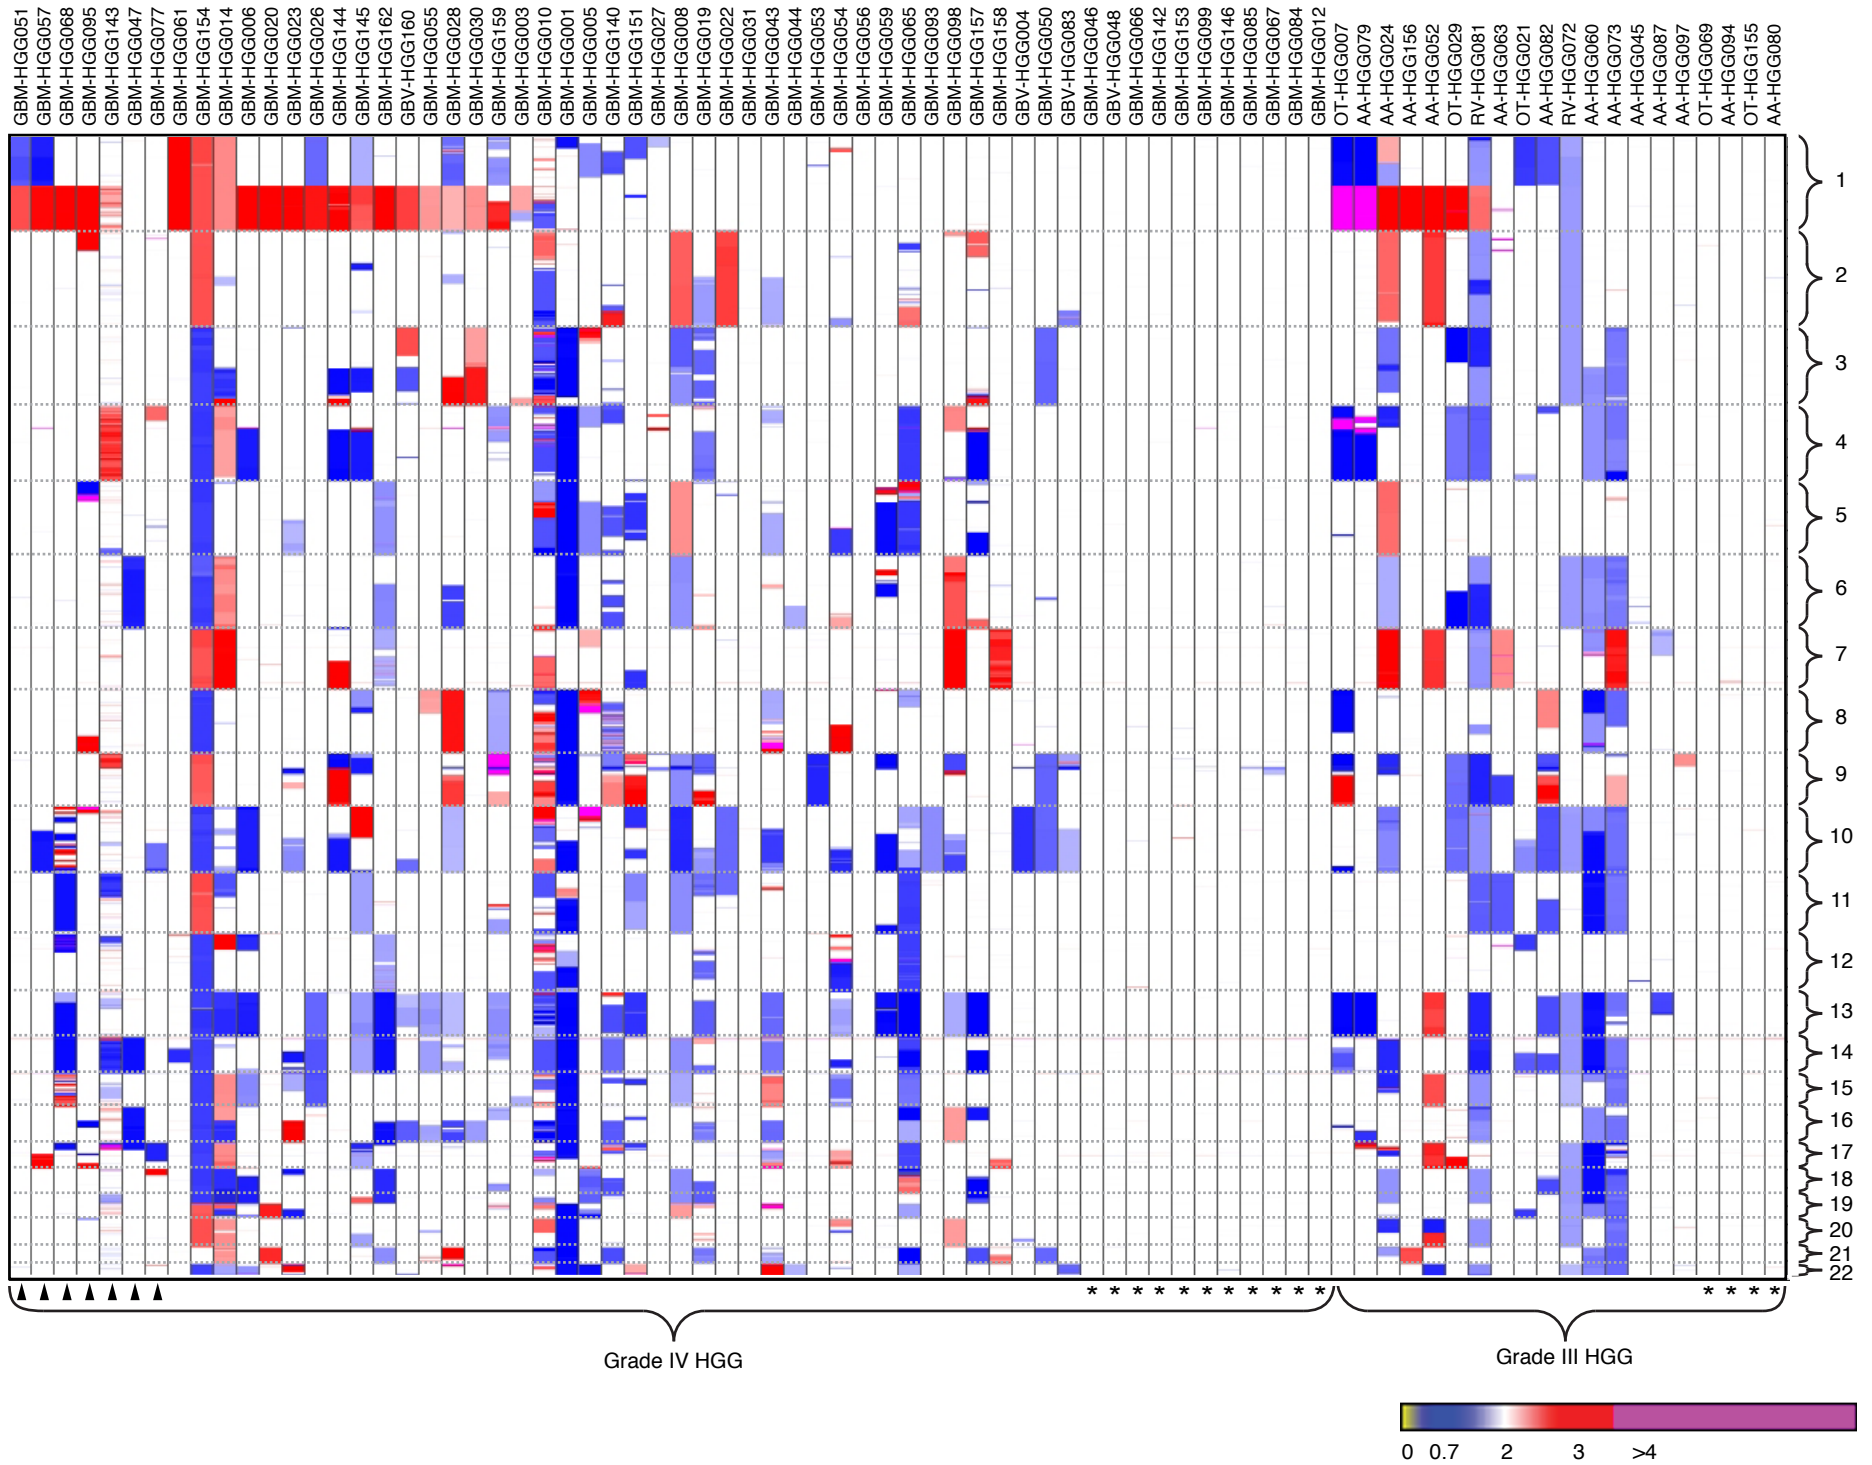

Supplement: JCO.2009.26.7252_2.pdf [file JCO.2009.26.7252_2.pdf]

Figure S2A

Affymetrix 500K SNP

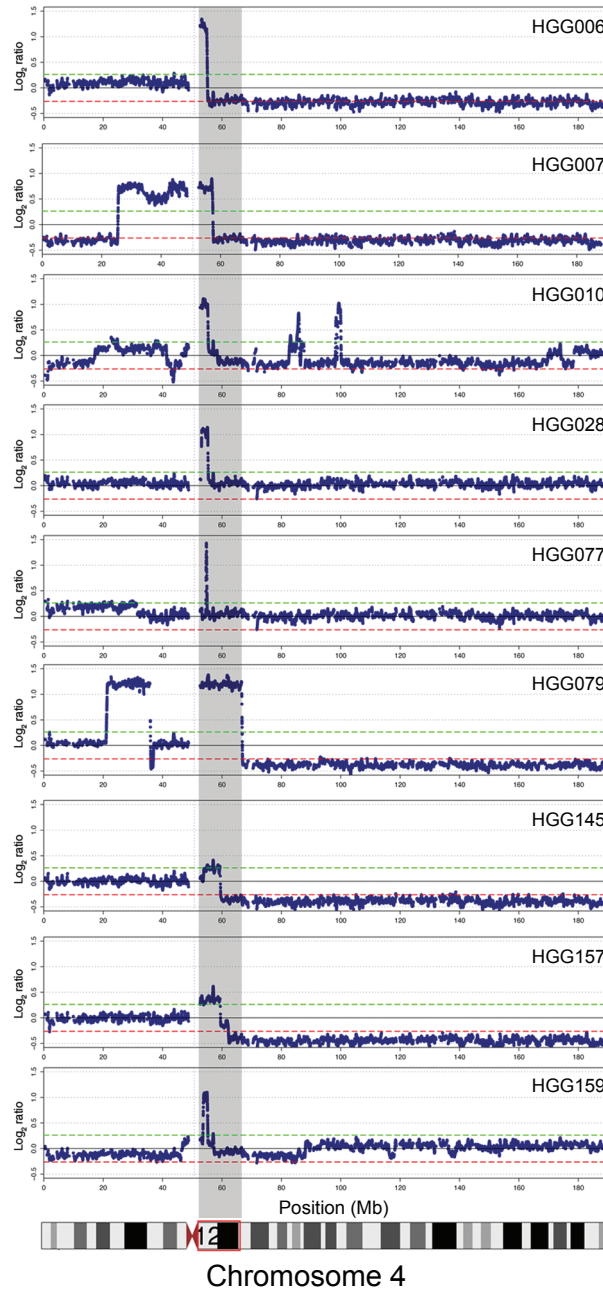

Figure S2B

Fluorescent in situ hybridisation

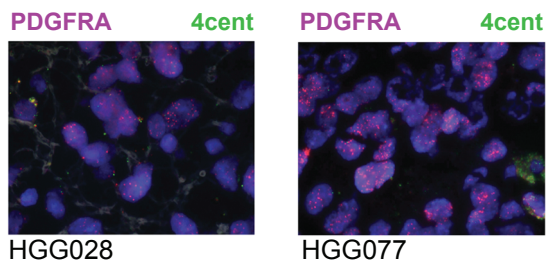

Supplement: JCO.2009.26.7252_3.pdf [file JCO.2009.26.7252_3.pdf]

Figure S3A

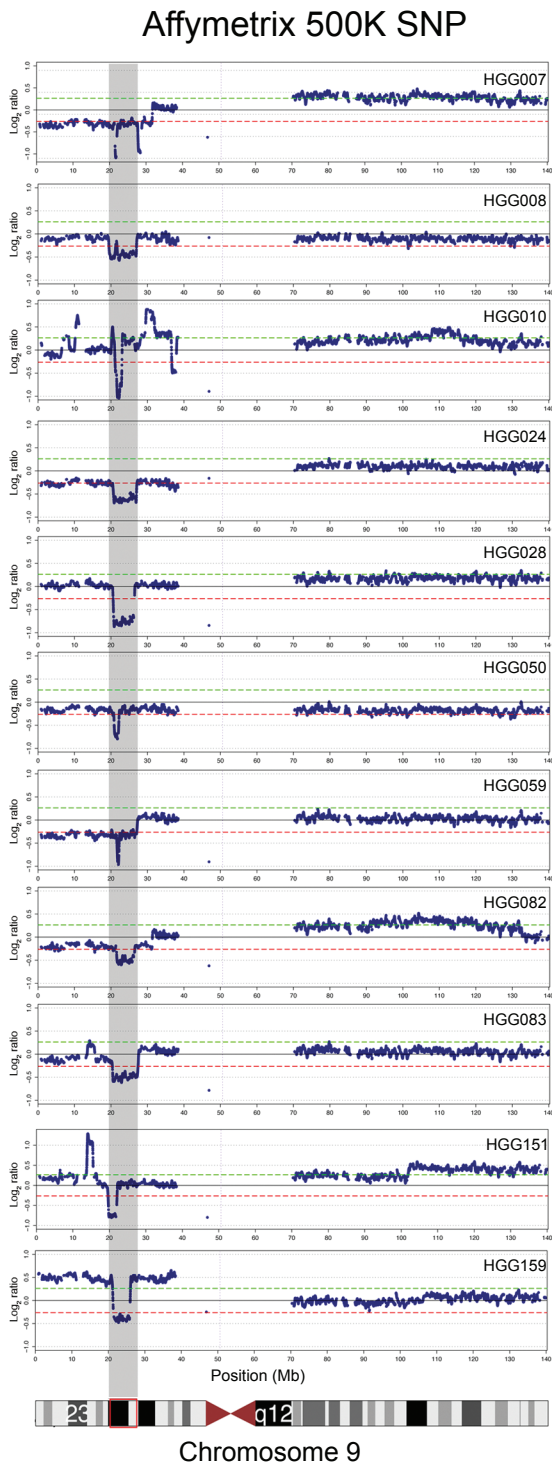

Figure S3B

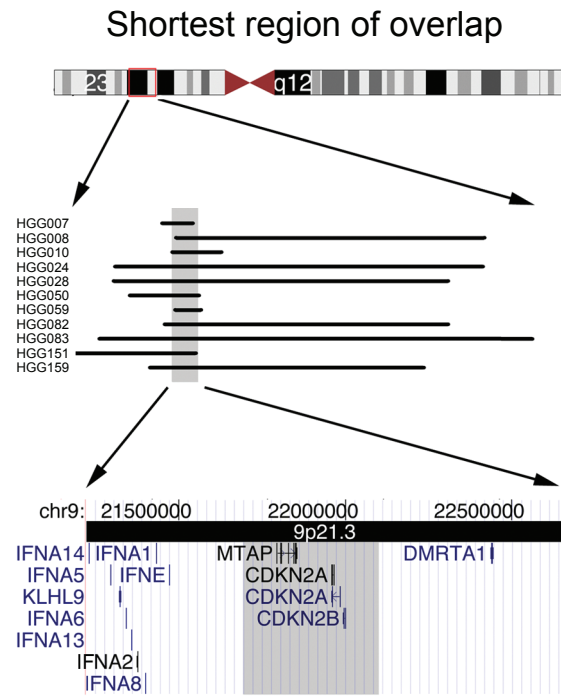

Figure S3C

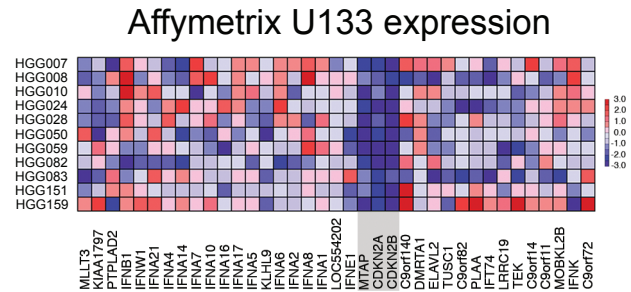

Figure S3D

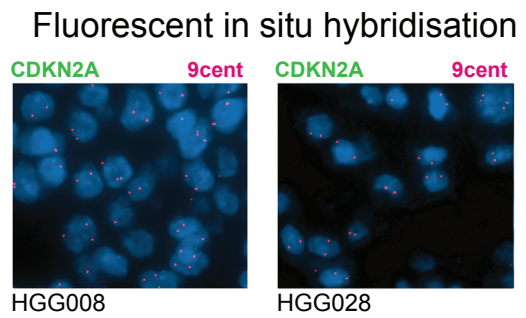

Supplement: JCO.2009.26.7252_4.pdf [file JCO.2009.26.7252_4.pdf]

Figure S4

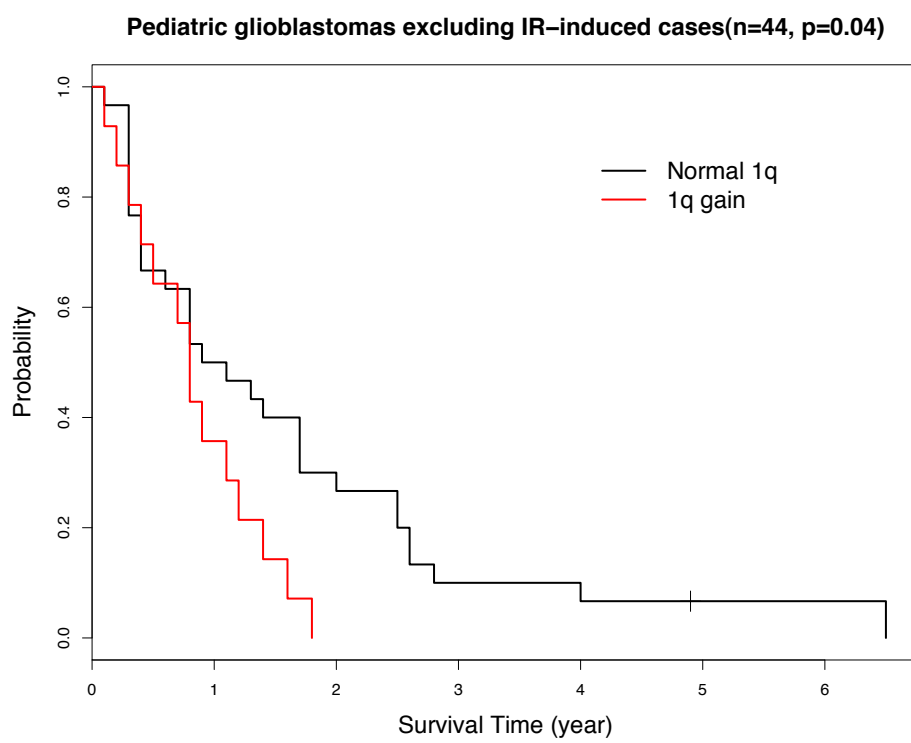

Supplement: JCO.2009.26.7252_5.pdf [file JCO.2009.26.7252_5.pdf]

Figure S5A

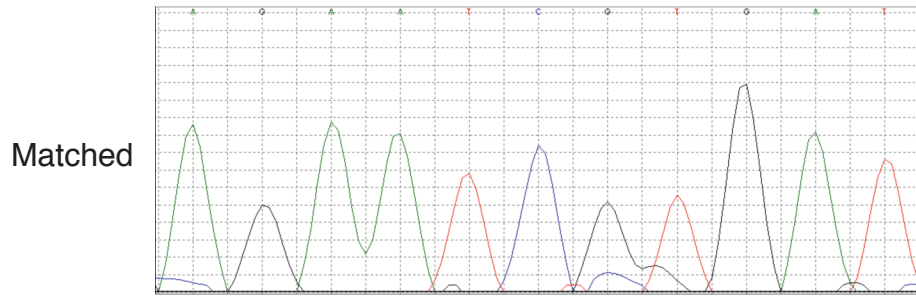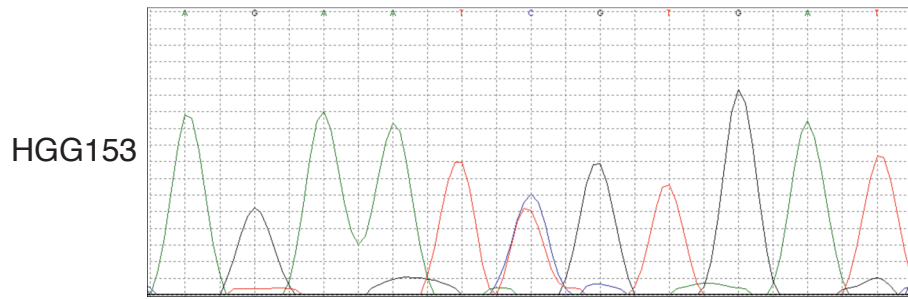

↑  
C145T (R49C)

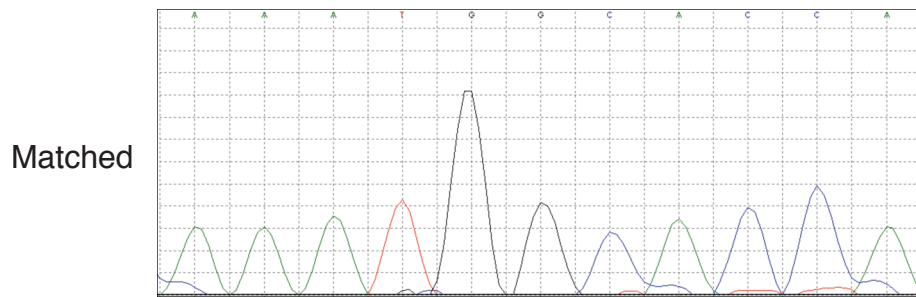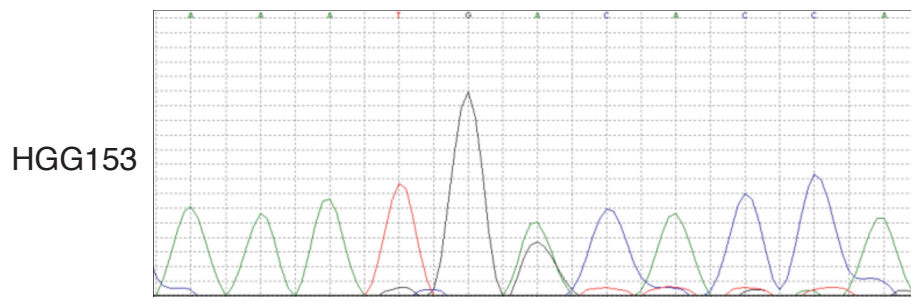

↑  
G290A (G97D)

**Figure S5B**

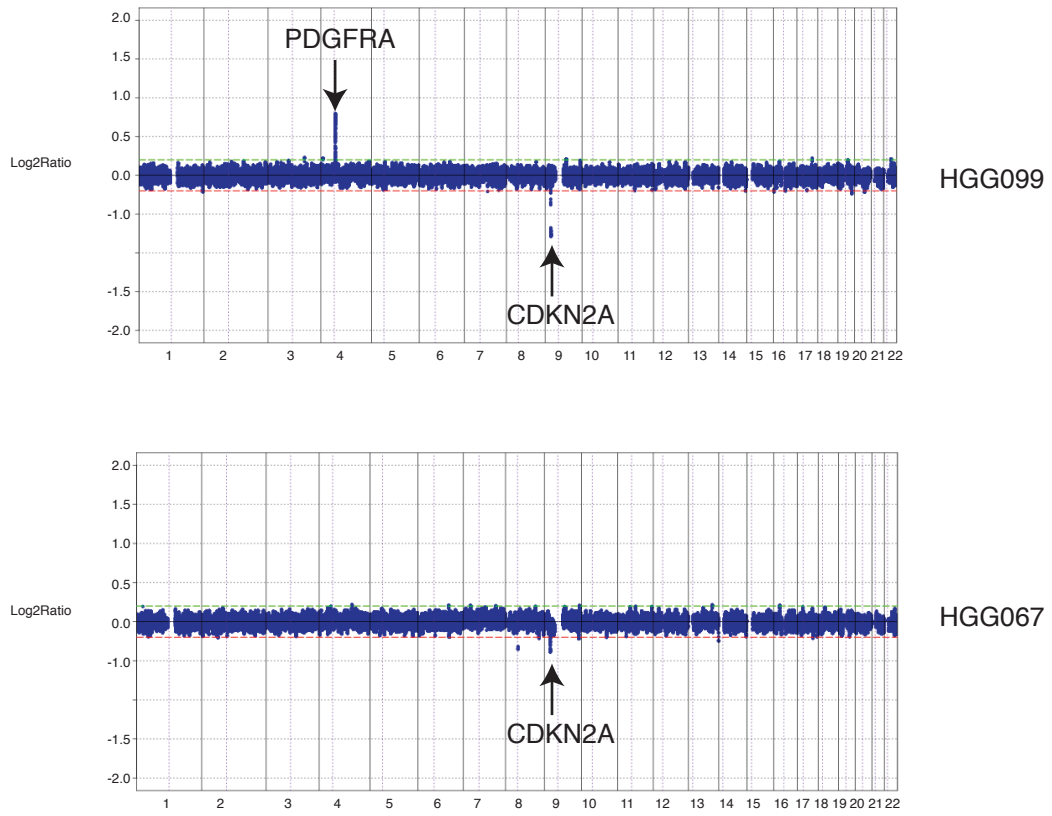

**Figure S5C**

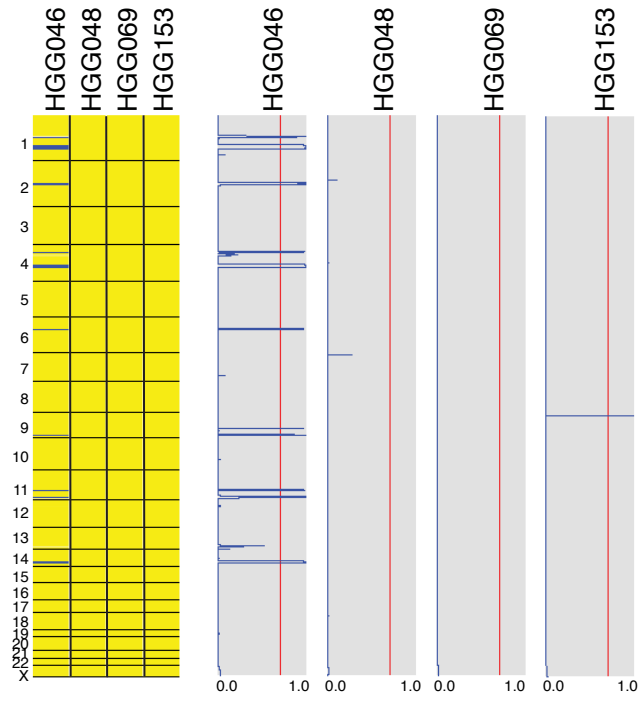

Supplement: JCO.2009.26.7252_6.pdf [file JCO.2009.26.7252_6.pdf]

Fig S6A

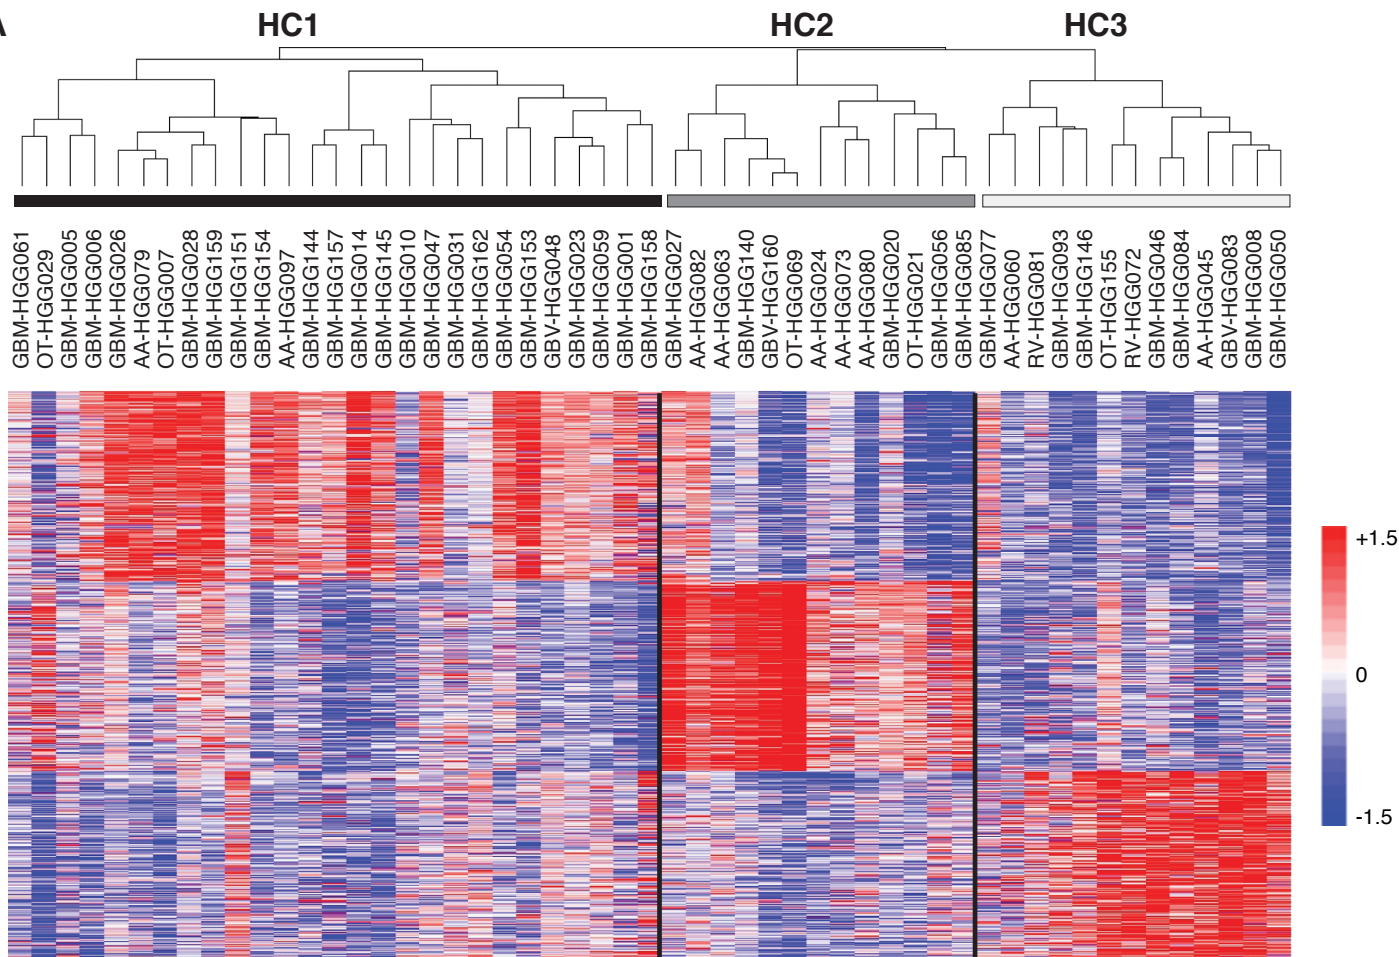

Fig S6B

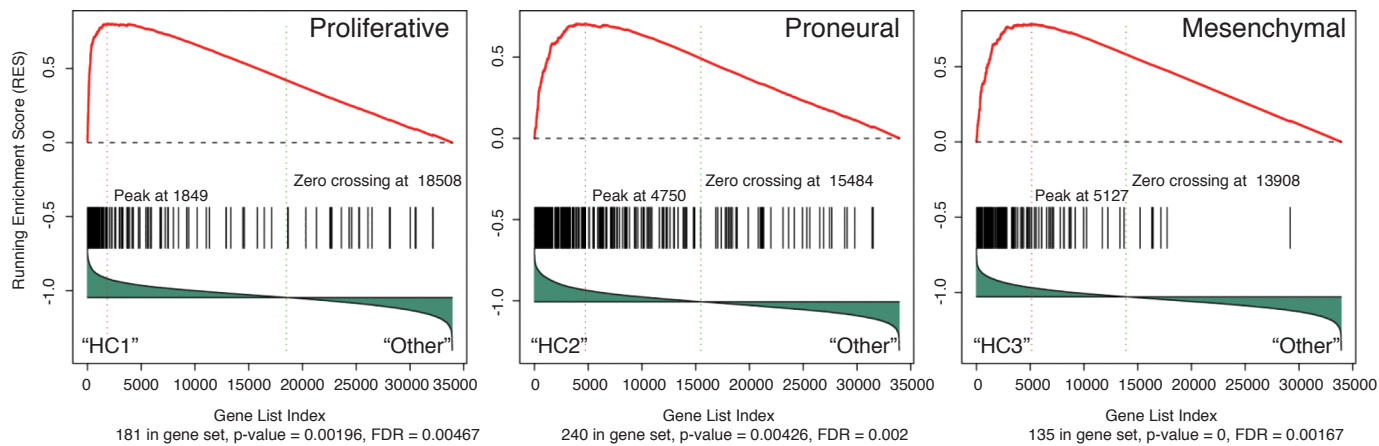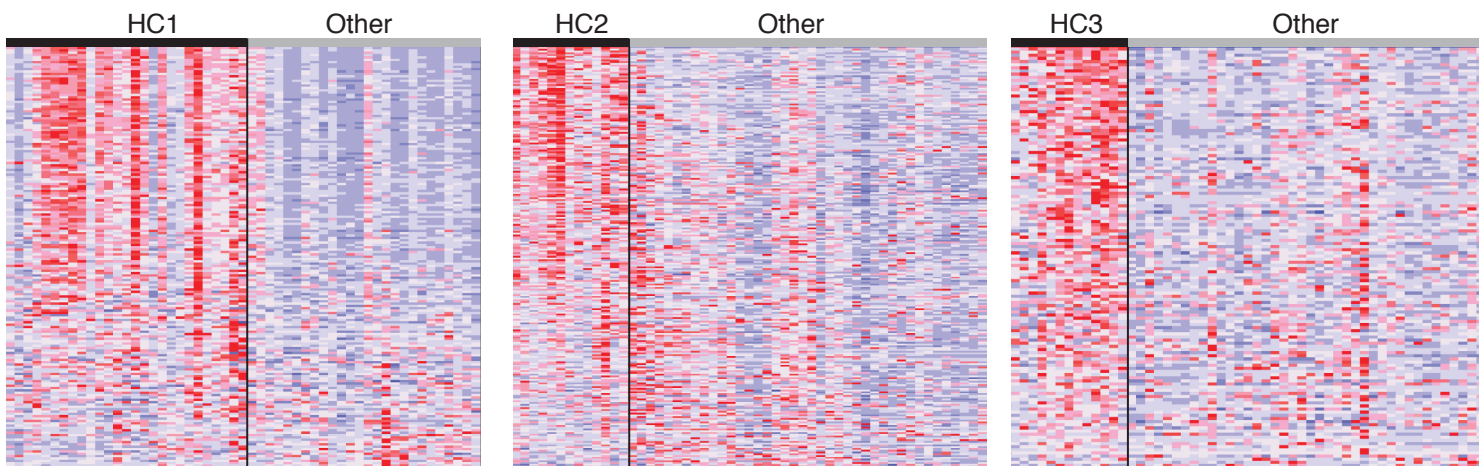

Supplement: JCO.2009.26.7252_7.pdf [file JCO.2009.26.7252_7.pdf]
